# Supplementary material for: Hardness and electronic properties of Si–C–N structures
Source: Royal Society of Chemistry journal article supplement (doi:10.1039/d3cp03425a), 2023-01-01
Supplement: d3cp03425a3.pdf [file d3cp03425a3.pdf]

## SUPPLEMENTARY MATERIAL

### Hardness and Electronic Properties of Si-C-N Structures

Shuai Chen,<sup>a</sup> Xiaogang Guo,<sup>a</sup> Hefei Li,<sup>a</sup> Pan Ying,<sup>a</sup> Rongxin Sun,<sup>a</sup> Mengdong Ma,<sup>a, b</sup> Yingju Wu,<sup>a</sup>

Lingjuan Hao,<sup>c</sup> Dongli Yu,<sup>a</sup> Julong He,<sup>a\*</sup> Yufei Gao,<sup>a\*</sup> and Yongjun Tian<sup>a</sup>

<sup>a</sup> Center for High Pressure Science (CHiPS), State Key Laboratory of Metastable Materials Science and Technology, Yanshan University, Qinhuangdao, 066004, China

<sup>b</sup> Macao Institute of Materials Science and Engineering, Macau University of Science and Technology, Taipa, Macao 999078, China

<sup>c</sup> Handan key Laboratory of Intelligent Awareness and Application, Handan University, Handan, 056001, China

\* Author to whom correspondence should be addressed. E-mail address: [hjl@ysu.edu.cn](mailto:hjl@ysu.edu.cn);  
[gyf@ysu.edu.cn](mailto:gyf@ysu.edu.cn)

**Table S1.** Atomic Wyckoff positions of the  $\text{SiC}_3\text{N}_3$ ,  $\text{SiC}_7\text{N}_6$ , and  $\text{SiC}_{13}\text{N}_{14}$ .

| $\text{SiC}_3\text{N}_3$ |                       | $\text{SiC}_7\text{N}_6$ |                       | $\text{SiC}_{13}\text{N}_{14}$ |                       |
|--------------------------|-----------------------|--------------------------|-----------------------|--------------------------------|-----------------------|
| Atom                     | Wyckoff positions     | Atom                     | Wyckoff positions     | Atom                           | Wyckoff positions     |
| $\text{Si}_1$            | 2a (0.00, 0.00, 0.47) | Si                       | 2a (0.00, 1.00, 0.46) | Si                             | 1a (0.00, 0.00, 0.90) |
| $\text{Si}_2$            | 2b (0.67, 0.33, 0.47) | $\text{C}_1$             | 6c (0.50, 0.58, 0.66) | $\text{C}_1$                   | 1a (0.00, 0.00, 0.49) |
| $\text{C}_1$             | 6c (0.52, 0.59, 0.66) | $\text{C}_2$             | 6c (0.79, 0.09, 0.46) | $\text{C}_2$                   | 3d (0.10, 0.80, 0.96) |
| $\text{C}_2$             | 6c (0.78, 0.08, 0.46) | $\text{C}_3$             | 6c (0.33, 0.67, 0.58) | $\text{C}_3$                   | 3d (0.57, 0.49, 0.16) |
| $\text{N}_1$             | 6c (0.41, 0.09, 0.44) | $\text{N}_1$             | 3d (0.40, 0.07, 0.43) | $\text{C}_4$                   | 3d (0.26, 0.18, 0.45) |
| $\text{N}_2$             | 6c (0.65, 0.02, 0.73) | $\text{N}_2$             | 3d (0.36, 0.35, 0.71) | $\text{C}_5$                   | 3d (0.49, 0.57, 0.66) |
|                          |                       |                          |                       | $\text{N}_1$                   | 3d (0.66, 0.60, 0.43) |
|                          |                       |                          |                       | $\text{N}_2$                   | 3d (0.33, 0.33, 0.70) |
|                          |                       |                          |                       | $\text{N}_3$                   | 3d (0.59, 0.65, 0.94) |
|                          |                       |                          |                       | $\text{N}_4$                   | 3d (0.67, 0.00, 0.21) |
|                          |                       |                          |                       | $\text{N}_5$                   | 1b (0.33, 0.67, 0.57) |
|                          |                       |                          |                       | $\text{N}_6$                   | 1c (0.67, 0.33, 0.08) |

**Table S2.** Chemical bond parameters and Vickers hardness of SiC<sub>3</sub>N<sub>3</sub>.

| <b>Bond type</b>                | <b><i>d</i> (Å)</b> | <b>Pop</b> | <b><i>F<sub>i</sub></i></b> | <b><i>N<sub>e</sub></i></b> | <b><i>H<sup>x-y</sup><sub>v</sub></i><br/>(GPa)</b> | <b><i>H<sub>v</sub></i> (GPa)</b> |
|---------------------------------|---------------------|------------|-----------------------------|-----------------------------|-----------------------------------------------------|-----------------------------------|
| C <sub>1</sub> -Si <sub>2</sub> | 1.93                | 0.64       | 0.40                        | 0.32                        | 5.12                                                | 28.04                             |
| C <sub>2</sub> -Si <sub>1</sub> | 1.95                | 0.66       | 0.41                        | 0.31                        | 14.35                                               |                                   |
| C <sub>1</sub> -N <sub>1</sub>  | 1.43                | 0.80       | 0.31                        | 0.89                        | 57.35                                               |                                   |
| C <sub>1</sub> -N <sub>1</sub>  | 1.55                | 0.62       | 0.49                        | 0.71                        | 32.72                                               |                                   |
| C <sub>1</sub> -N <sub>2</sub>  | 1.51                | 0.65       | 0.43                        | 0.77                        | 38.07                                               |                                   |
| C <sub>2</sub> -N <sub>1</sub>  | 1.49                | 0.66       | 0.46                        | 0.79                        | 36.15                                               |                                   |
| C <sub>2</sub> -N <sub>2</sub>  | 1.48                | 0.77       | 0.28                        | 0.80                        | 44.16                                               |                                   |
| C <sub>2</sub> -N <sub>2</sub>  | 1.47                | 0.73       | 0.28                        | 0.82                        | 45.70                                               |                                   |

**Table S3.** Chemical bond parameters and Vickers hardness of SiC<sub>7</sub>N<sub>6</sub>.

| <b>Bond type</b>               | <b><i>d</i> (Å)</b> | <b>Pop</b> | <b><i>F<sub>i</sub></i></b> | <b><i>N<sub>e</sub></i></b> | <b><i>H<sup>x-y</sup><sub>v</sub></i><br/>(GPa)</b> | <b><i>H<sub>v</sub></i> (GPa)</b> |
|--------------------------------|---------------------|------------|-----------------------------|-----------------------------|-----------------------------------------------------|-----------------------------------|
| C <sub>2</sub> -Si             | 1.86                | 0.67       | 0.35                        | 0.32                        | 15.43                                               | 31.17                             |
| C <sub>1</sub> -C <sub>3</sub> | 1.57                | 0.86       | 0.18                        | 0.55                        | 10.91                                               |                                   |
| C <sub>1</sub> -N <sub>1</sub> | 1.44                | 0.77       | 0.24                        | 0.80                        | 48.93                                               |                                   |
| C <sub>1</sub> -N <sub>2</sub> | 1.45                | 0.72       | 0.28                        | 0.79                        | 51.63                                               |                                   |
| C <sub>2</sub> -N <sub>1</sub> | 1.57                | 0.65       | 0.35                        | 0.62                        | 28.51                                               |                                   |
| C <sub>2</sub> -N <sub>1</sub> | 1.51                | 0.64       | 0.47                        | 0.69                        | 29.25                                               |                                   |
| C <sub>2</sub> -N <sub>2</sub> | 1.45                | 0.77       | 0.29                        | 0.78                        | 48.25                                               |                                   |
| C <sub>2</sub> -N <sub>2</sub> | 1.46                | 0.83       | 0.22                        | 0.78                        | 52.09                                               |                                   |

**Table S4.** Chemical bond parameters and Vickers hardness of SiC<sub>13</sub>N<sub>14</sub>.

| Bond type                      | $d$ (Å) | Pop  | $F_i$ | $N_e$ | $H^{x-y}_v$<br>(GPa) | $H_v$ (GPa) |
|--------------------------------|---------|------|-------|-------|----------------------|-------------|
| C <sub>1</sub> -N <sub>1</sub> | 1.50    | 0.74 | 0.26  | 0.69  | 40.30                | 40.64       |
| C <sub>1</sub> -N <sub>2</sub> | 1.44    | 0.75 | 0.26  | 0.79  | 59.54                |             |
| C <sub>1</sub> -N <sub>3</sub> | 1.44    | 0.79 | 0.21  | 0.78  | 51.51                |             |
| C <sub>1</sub> -N <sub>5</sub> | 1.52    | 0.72 | 0.16  | 0.67  | 22.85                |             |
| C <sub>2</sub> -N <sub>1</sub> | 1.50    | 0.74 | 0.25  | 0.70  | 41.83                |             |
| C <sub>2</sub> -N <sub>2</sub> | 1.48    | 0.79 | 0.21  | 0.72  | 55.16                |             |
| C <sub>2</sub> -N <sub>4</sub> | 1.46    | 0.81 | 0.19  | 0.75  | 49.93                |             |
| C <sub>2</sub> -C <sub>5</sub> | 1.59    | 0.78 | 0.07  | 0.51  | 47.09                |             |
| C <sub>3</sub> -N <sub>1</sub> | 1.45    | 0.78 | 0.23  | 0.77  | 49.81                |             |
| C <sub>3</sub> -N <sub>3</sub> | 1.50    | 0.77 | 0.21  | 0.69  | 37.26                |             |
| C <sub>3</sub> -N <sub>4</sub> | 1.45    | 0.76 | 0.26  | 0.77  | 48.12                |             |
| C <sub>3</sub> -N <sub>6</sub> | 1.52    | 0.71 | 0.16  | 0.67  | 30.17                |             |
| C <sub>4</sub> -Si             | 1.78    | 0.68 | 0.26  | 0.36  | 18.74                |             |
| C <sub>4</sub> -N <sub>2</sub> | 1.45    | 0.82 | 0.24  | 0.77  | 54.56                |             |
| C <sub>4</sub> -N <sub>3</sub> | 1.49    | 0.63 | 0.47  | 0.70  | 27.16                |             |
| C <sub>4</sub> -N <sub>4</sub> | 1.42    | 0.78 | 0.29  | 0.82  | 48.24                |             |

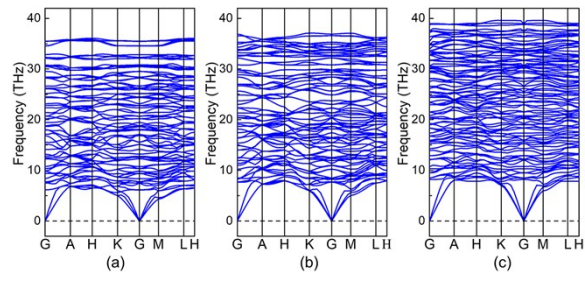

**Figure S1.** Phonon dispersion curves of (a)  $\text{SiC}_3\text{N}_3$ , (b)  $\text{SiC}_7\text{N}_6$ , and (c)  $\text{SiC}_{13}\text{N}_{14}$
