# Supplementary figures and images for: Hardness and electronic properties of Si–C–N structures
Source: Royal Society of Chemistry journal article supplement (doi:10.1039/d3cp03425a), 2023-01-01

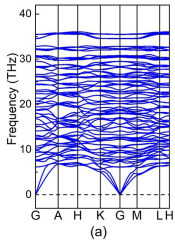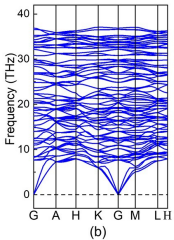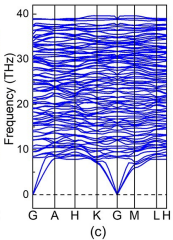

Supplement: d3cp03425a2.pdf [file d3cp03425a2.pdf]
